# Supplementary material
Source: PubMed Central journal article supplement (PMC4302750)
Supplement: NIHMS653773-supplement-Supplemetary_Information.pdf [file NIHMS653773-supplement-Supplemetary_Information.pdf]

# Supplementary Figure 1

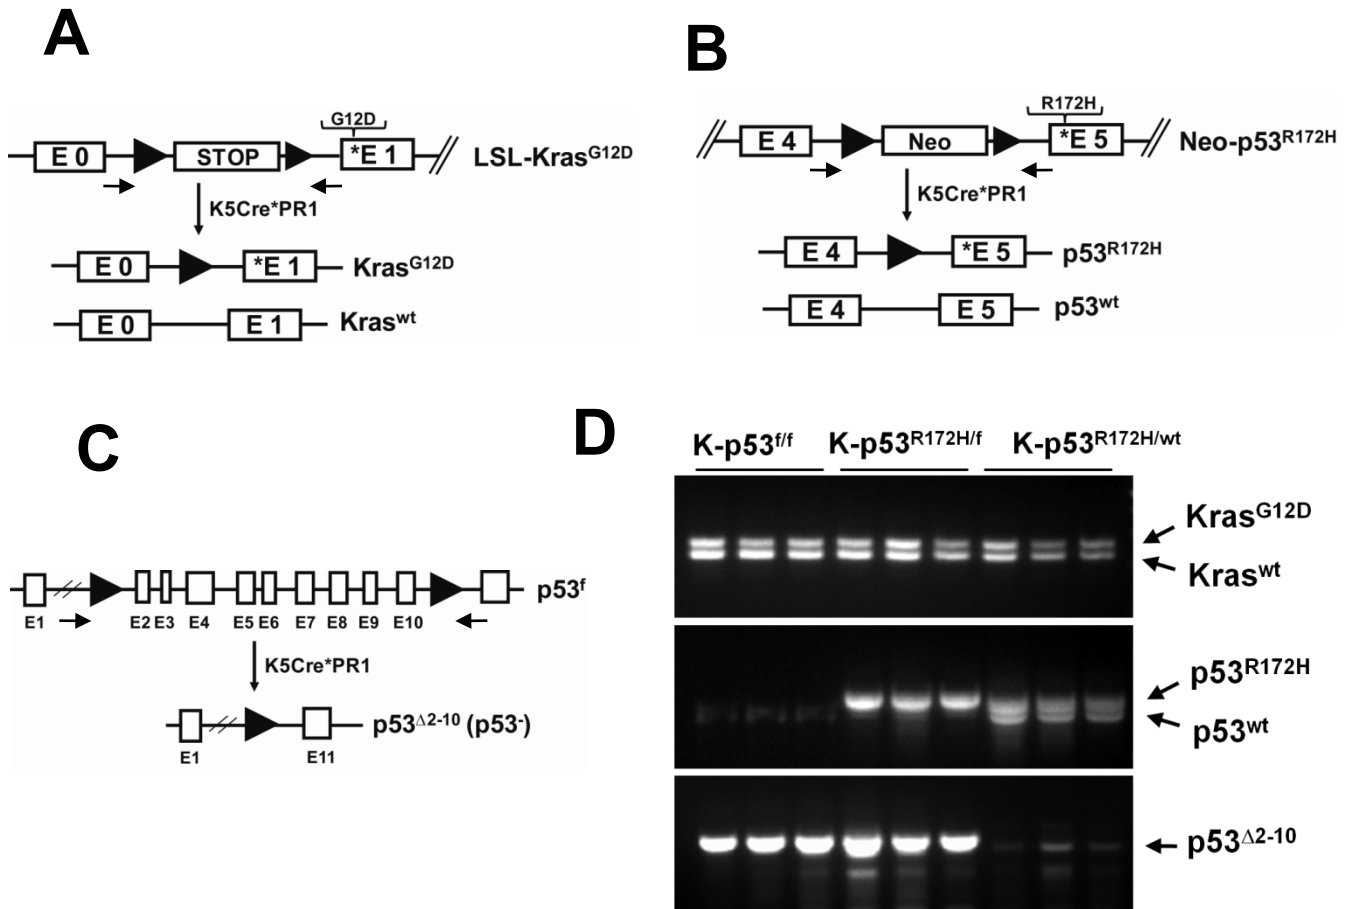

**Supplementary Figure 1. Schematic representation of the conditional alleles and activation in tumors. (A)** LSL-Ras<sup>G12D</sup> allele. After Cre activation the STOP cassette is deleted and the K-ras<sup>G12D</sup> mutation is expressed. **(B)** Neo-p53<sup>R172H</sup> allele. Cre activation induces deletion of the Neo cassette and activation of the p53<sup>R172H</sup> mutation. **(C)** Floxed p53 (p53<sup>f</sup>) allele. After Cre activation Exons 2-10 of the p53 gene are deleted. Black triangles denote loxP sites. **(D)** Activation of conditional alleles in oral tumors that developed in mice with the indicated genotypes, using primers indicated by arrows in panels **A-C**, for each of the conditional alleles. Three tumors per genotype were analyzed.

# Supplementary Figure 2

**A**

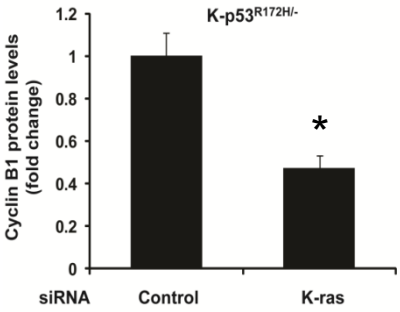

**B**

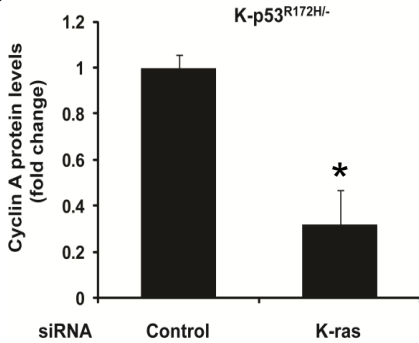

**C**

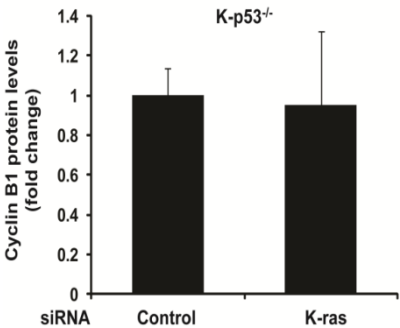

**D**

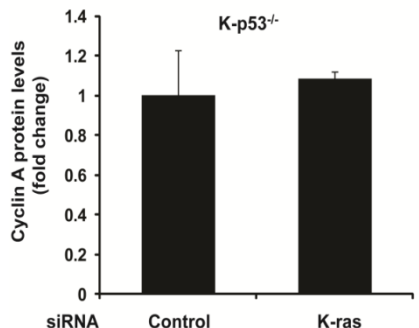

**E**

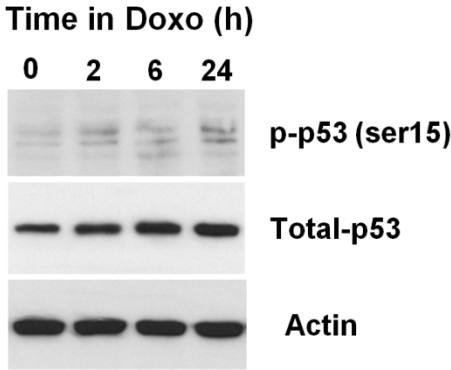

**F**

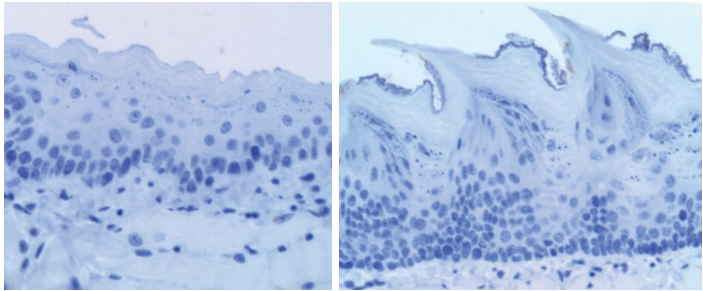

**Supplementary Figure 2.** (A) Cyclin B1 and (B) cyclin A levels in western blots shown in Figure 6F were quantified after normalization with  $\beta$ -actin. (C) Quantification of cyclin B1 and (D) cyclin A protein levels shown in Figure 6G after normalization with  $\beta$ -actin. Results in A-D were expressed as fold change relative to cells transfected with control siRNA. \* $p=0.01-0.05$ . (E) Phosphorylation of mutant p53 at serine 15 after incubating K-p53<sup>R172H/-</sup> cells in 200ng/ml Doxorubicin for the indicated times. (F) Immunohistochemistry for  $\gamma$ H2AX in normal oral epithelium. Note the lack of DNA damage in epithelial cells.

**Supplementary Table 1.** Genes differentially expressed in K-p53<sup>R172H/-</sup> and K-p53<sup>R172H/+</sup> oral tumors compared to K-p53<sup>-/-</sup> tumors. Fold change is indicated

| Gene symbol                        | Gene name                                                           | fold change<br>(K-p53 <sup>R172H/-</sup> ) | fold change<br>(K-p53 <sup>R172H/+</sup> ) |
|------------------------------------|---------------------------------------------------------------------|--------------------------------------------|--------------------------------------------|
| 2310002L13Rik                      | RIKEN cDNA 2310002L13 gene                                          | 6.63                                       | 5.66                                       |
| H19                                | H19 fetal liver mRNA                                                | 4.64                                       | 3.63                                       |
| Chi3l3                             | chitinase 3-like 3                                                  | 3.79                                       | 2.86                                       |
| Dusp6                              | dual specificity phosphatase 6                                      | 3.53                                       | 3.47                                       |
| Cxcl2                              | chemokine (C-X-C motif) ligand 2                                    | 3.19                                       | 3.62                                       |
| Ifi205                             | interferon activated gene 205                                       | 3.13                                       | 2.15                                       |
| Mm.209077.1                        |                                                                     | 2.74                                       | 2.92                                       |
| Dusp4                              | dual specificity phosphatase 4                                      | 2.65                                       | 2.59                                       |
| Cxcl1                              | chemokine (C-X-C motif) ligand 1                                    | 2.54                                       | 2.31                                       |
| Cyp1b1                             | cytochrome P450, family 1, subfamily b, polypeptide 1               | 2.49                                       | 2.14                                       |
| D17H6S56E-5                        | DNA segment, Chr 17, human D6S56E 5                                 | 2.49                                       | 2.14                                       |
| Mmp13                              | matrix metalloproteinase 13                                         | 2.46                                       | 3.64                                       |
| Depdc1a                            | DEP domain containing 1a                                            | 2.43                                       | 2.28                                       |
| Il1a                               | interleukin 1 alpha                                                 | 2.41                                       | 2.03                                       |
| Hp                                 | haptoglobin                                                         | 2.4                                        | 2.31                                       |
| Il1rn                              | interleukin 1 receptor antagonist                                   | 2.36                                       | 2.12                                       |
| 1600029D21Rik                      | RIKEN cDNA 1600029D21 gene                                          | 2.35                                       | 1.9                                        |
| Cpeb4                              | cytoplasmic polyadenylation element binding protein 4               | 2.29                                       | 2.33                                       |
| Scd2                               | stearoyl-Coenzyme A desaturase 2                                    | 2.19                                       | 2.06                                       |
| Hmnr                               | hyaluronan mediated motility receptor (RHAMM)                       | 2.16                                       | 1.78                                       |
| Uox                                | urate oxidase                                                       | 2.13                                       | 1.8                                        |
| D530037H12Rik                      | RIKEN cDNA D530037H12 gene                                          | 2.13                                       | 2.09                                       |
| Cbr2                               | carbonyl reductase 2                                                | 2.11                                       | 1.97                                       |
| Gda                                | guanine deaminase                                                   | 2.11                                       | 1.82                                       |
| Areg                               | amphiregulin                                                        | 2.1                                        | 2.06                                       |
| Slc4a7                             | solute carrier family 4, sodium bicarbonate cotransporter, member 7 | 2.07                                       | 2                                          |
| Snapc1                             | small nuclear RNA activating complex, polypeptide 1                 | 2.04                                       | 1.9                                        |
| Nusap1                             | nucleolar and spindle associated protein 1                          | 1.99                                       | 1.73                                       |
| Ifitm1                             | interferon induced transmembrane protein 1                          | 1.99                                       | 2.16                                       |
| 6430706D22Rik ///<br>A730008H23Rik | RIKEN cDNA 6430706D22 gene /// RIKEN cDNA A730008H23 gene           | 1.98                                       | 2.02                                       |
| C330027C09Rik                      | RIKEN cDNA C330027C09 gene                                          | 1.97                                       | 1.79                                       |

|               |                                                                                                                   |      |      |
|---------------|-------------------------------------------------------------------------------------------------------------------|------|------|
| Ddx6          | DEAD (Asp-Glu-Ala-Asp) box polypeptide 6                                                                          | 1.96 | 1.94 |
| Kif11         | kinesin family member 11                                                                                          | 1.96 | 1.72 |
| Malat1        | metastasis associated lung adenocarcinoma transcript 1 (non-coding RNA)                                           | 1.96 | 1.66 |
| Tgif1         | TGFB-induced factor homeobox 1                                                                                    | 1.95 | 2    |
| Zwilch        | Zwilch, kinetochore associated, homolog (Drosophila)                                                              | 1.93 | 1.71 |
| Adam8         | a disintegrin and metallopeptidase domain 8                                                                       | 1.93 | 1.89 |
| Aspm          | asp (abnormal spindle)-like, microcephaly associated (Drosophila)                                                 | 1.93 | 1.67 |
| Mall          | mal, T-cell differentiation protein-like                                                                          | 1.93 | 1.77 |
| Kcne3         | potassium voltage-gated channel, Isk-related subfamily, gene 3                                                    | 1.92 | 2.05 |
| Fam129a       | family with sequence similarity 129, member A                                                                     | 1.92 | 1.84 |
| Lin7c         | lin-7 homolog C (C. elegans)                                                                                      | 1.9  | 1.84 |
| Bnc1          | basonuclin 1                                                                                                      | 1.9  | 1.89 |
| Cugbp1        | CUG triplet repeat, RNA binding protein 1                                                                         | 1.88 | 1.74 |
| Ccnb2         | cyclin B2                                                                                                         | 1.88 | 1.65 |
| Kif20b        | kinesin family member 20B                                                                                         | 1.88 | 1.7  |
| Ccnb1         | cyclin B1                                                                                                         | 1.87 | 1.67 |
| Schip1        | schwannomin interacting protein 1                                                                                 | 1.87 | 1.71 |
| Abcb10        | ATP-binding cassette, sub-family B (MDR/TAP), member 10                                                           | 1.84 | 2.02 |
| Kif20a        | kinesin family member 20A                                                                                         | 1.84 | 1.74 |
| Cep55         | centrosomal protein 55                                                                                            | 1.83 | 1.65 |
| Ccr1          | chemokine (C-C motif) receptor 1                                                                                  | 1.81 | 2    |
| Megf9         | multiple EGF-like-domains 9                                                                                       | 1.78 | 1.82 |
| Tgm3          | transglutaminase 3, E polypeptide                                                                                 | 1.75 | 1.76 |
| Anxa4         | annexin A4                                                                                                        | 1.75 | 1.78 |
| Tmem48        | transmembrane protein 48                                                                                          | 1.74 | 1.55 |
| Ass1          | argininosuccinate synthetase 1                                                                                    | 1.73 | 1.7  |
| Ugcg          | UDP-glucose ceramide glucosyltransferase                                                                          | 1.73 | 1.71 |
| 6720463M24Rik | RIKEN cDNA 6720463M24 gene                                                                                        | 1.73 | 1.63 |
| Cdc27         | cell division cycle 27 homolog (S. cerevisiae)                                                                    | 1.73 | 1.71 |
| DXErtd223e    | DNA segment, Chr X, ERATO Doi 223, expressed                                                                      | 1.72 | 1.68 |
| Pthlh         | parathyroid hormone-like peptide                                                                                  | 1.72 | 1.81 |
| Tspan7        | tetraspanin 7                                                                                                     | 1.71 | 1.61 |
| Net1          | neuroepithelial cell transforming gene 1                                                                          | 1.71 | 1.6  |
| Ero1l         | ERO1-like (S. cerevisiae)                                                                                         | 1.7  | 1.54 |
| Kif2c         | kinesin family member 2C /// similar to Kinesin-like protein KIF2C (Mitotic centromere-associated kinesin) (MCAK) | 1.7  | 1.55 |

|                       |                                                                            |      |      |
|-----------------------|----------------------------------------------------------------------------|------|------|
| Pkn2                  | protein kinase N2                                                          | 1.7  | 1.72 |
| Mier1                 | mesoderm induction early response 1 homolog (Xenopus laevis)               | 1.7  | 1.76 |
| Mmp10                 | matrix metalloproteinase 10                                                | 1.69 | 1.82 |
| Suz12                 | suppressor of zeste 12 homolog (Drosophila)                                | 1.69 | 1.53 |
| Sgol2                 | shugoshin-like 2 (S. pombe)                                                | 1.67 | 1.69 |
| Ccna2                 | cyclin A2                                                                  | 1.66 | 1.5  |
| Ect2                  | ect2 oncogene                                                              | 1.66 | 1.53 |
| Cenpa                 | centromere protein A                                                       | 1.66 | 1.55 |
| Yes1                  | Yamaguchi sarcoma viral (v-yes) oncogene homolog 1                         | 1.65 | 1.58 |
| D130067C23Rik /// Sp3 | RIKEN cDNA D130067C23 gene /// trans-acting transcription factor 3         | 1.64 | 1.68 |
| Mpp5                  | membrane protein, palmitoylated 5 (MAGUK p55 subfamily member 5)           | 1.64 | 1.52 |
| Bzw1                  | basic leucine zipper and W2 domains 1                                      | 1.64 | 1.6  |
| Etv3                  | ets variant gene 3                                                         | 1.63 | 1.64 |
| Papolg                | poly(A) polymerase gamma                                                   | 1.63 | 1.54 |
| Terf1                 | telomeric repeat binding factor 1                                          | 1.62 | 1.76 |
| Dsc2                  | desmocollin 2                                                              | 1.62 | 1.61 |
| LOC630729             | similar to Glutathione reductase, mitochondrial precursor (GR) (GRase)     | 1.62 | 1.76 |
| P2ry5                 | purinergic receptor P2Y, G-protein coupled, 5                              | 1.62 | 1.56 |
| Stom                  | stomatin                                                                   | 1.61 | 1.59 |
| Cenpq                 | centromere protein Q                                                       | 1.6  | 1.53 |
| Bub1                  | budding uninhibited by benzimidazoles 1 homolog (S. cerevisiae)            | 1.6  | 1.49 |
| Smek1                 | SMEK homolog 1, suppressor of mek1 (Dictyostelium)                         | 1.6  | 1.58 |
| 2810417H13Rik         | RIKEN cDNA 2810417H13 gene                                                 | 1.59 | 1.49 |
| Ppp1r12a              | protein phosphatase 1, regulatory (inhibitor) subunit 12A                  | 1.59 | 1.53 |
| Birc5                 | baculoviral IAP repeat-containing 5                                        | 1.58 | 1.46 |
| Klf6                  | Kruppel-like factor 6                                                      | 1.57 | 1.47 |
| E2f7                  | E2F transcription factor 7                                                 | 1.57 | 1.64 |
| Bcl10                 | B-cell leukemia/lymphoma 10                                                | 1.56 | 1.47 |
| Zfp36l1               | zinc finger protein 36, C3H type-like 1                                    | 1.56 | 1.56 |
| Fcho2                 | FCH domain only 2                                                          | 1.56 | 1.6  |
| Cks1b                 | CDC28 protein kinase 1b                                                    | 1.55 | 1.46 |
| Spry2                 | sprouty homolog 2 (Drosophila)                                             | 1.54 | 1.75 |
| Elavl1                | ELAV (embryonic lethal, abnormal vision, Drosophila)-like 1 (Hu antigen R) | 1.53 | 1.5  |

|                                                                                                                                                                                            |                                                                                                                                                                                                                                                                                                                                   |      |      |
|--------------------------------------------------------------------------------------------------------------------------------------------------------------------------------------------|-----------------------------------------------------------------------------------------------------------------------------------------------------------------------------------------------------------------------------------------------------------------------------------------------------------------------------------|------|------|
| Krt14                                                                                                                                                                                      | keratin 14                                                                                                                                                                                                                                                                                                                        | 1.53 | 1.45 |
| Hist1h3a ///<br>Hist1h3b ///<br>Hist1h3c ///<br>Hist1h3d ///<br>Hist1h3e ///<br>Hist1h3f ///<br>Hist1h3g ///<br>Hist1h3h ///<br>Hist1h3i ///<br>Hist2h3b ///<br>Hist2h3c1 ///<br>Hist2h3c2 | histone cluster 1, H3a /// histone cluster 1, H3b /// histone cluster 1, H3c /// histone cluster 1, H3d /// histone cluster 1, H3e /// histone cluster 1, H3f /// histone cluster 1, H3g /// histone cluster 1, H3h /// histone cluster 1, H3i /// histone cluster 2, H3b /// histone cluster 2, H3c1 /// histone cluster 2, H3c2 | 1.53 | 1.39 |
| Snhg3                                                                                                                                                                                      | small nucleolar RNA host gene (non-protein coding) 3                                                                                                                                                                                                                                                                              | 1.53 | 1.56 |
| Nup160                                                                                                                                                                                     | nucleoporin 160                                                                                                                                                                                                                                                                                                                   | 1.52 | 1.47 |
| 1190005F20Rik                                                                                                                                                                              | RIKEN cDNA 1190005F20 gene                                                                                                                                                                                                                                                                                                        | 1.51 | 1.44 |
| Hif1a                                                                                                                                                                                      | hypoxia inducible factor 1, alpha subunit                                                                                                                                                                                                                                                                                         | 1.51 | 1.47 |
| Sc5d                                                                                                                                                                                       | sterol-C5-desaturase (fungal ERG3, delta-5-desaturase) homolog ( <i>S. cerevisiae</i> )                                                                                                                                                                                                                                           | 1.51 | 1.51 |
| Hbs1l                                                                                                                                                                                      | Hbs1-like ( <i>S. cerevisiae</i> )                                                                                                                                                                                                                                                                                                | 1.51 | 1.44 |
| Tprkb                                                                                                                                                                                      | Tp53rk binding protein                                                                                                                                                                                                                                                                                                            | 1.49 | 1.56 |
| Sbno1                                                                                                                                                                                      | sno, strawberry notch homolog 1 ( <i>Drosophila</i> )                                                                                                                                                                                                                                                                             | 1.49 | 1.48 |
| Acsl3                                                                                                                                                                                      | acyl-CoA synthetase long-chain family member 3                                                                                                                                                                                                                                                                                    | 1.49 | 1.42 |
| Plk4                                                                                                                                                                                       | polo-like kinase 4 ( <i>Drosophila</i> )                                                                                                                                                                                                                                                                                          | 1.48 | 1.45 |
| Marvel2                                                                                                                                                                                    | MARVEL (membrane-associating) domain containing 2                                                                                                                                                                                                                                                                                 | 1.48 | 1.45 |
| Smc2                                                                                                                                                                                       | structural maintenance of chromosomes 2                                                                                                                                                                                                                                                                                           | 1.48 | 1.39 |
| Nrip1                                                                                                                                                                                      | nuclear receptor interacting protein 1                                                                                                                                                                                                                                                                                            | 1.46 | 1.45 |
| Ptpn12                                                                                                                                                                                     | protein tyrosine phosphatase, non-receptor type 12                                                                                                                                                                                                                                                                                | 1.46 | 1.42 |
| 6430527G18Rik                                                                                                                                                                              | RIKEN cDNA 6430527G18 gene                                                                                                                                                                                                                                                                                                        | 1.46 | 1.51 |
| Mrpl3                                                                                                                                                                                      | mitochondrial ribosomal protein L3                                                                                                                                                                                                                                                                                                | 1.45 | 1.42 |
| BC018507                                                                                                                                                                                   | cDNA sequence BC018507                                                                                                                                                                                                                                                                                                            | 1.45 | 1.4  |
| Mrpl50                                                                                                                                                                                     | mitochondrial ribosomal protein L50                                                                                                                                                                                                                                                                                               | 1.45 | 1.5  |
| Far1                                                                                                                                                                                       | fatty acyl CoA reductase 1                                                                                                                                                                                                                                                                                                        | 1.45 | 1.37 |
| Cdc20                                                                                                                                                                                      | cell division cycle 20 homolog ( <i>S. cerevisiae</i> )                                                                                                                                                                                                                                                                           | 1.45 | 1.39 |
| Senp2                                                                                                                                                                                      | SUMO/sentrin specific peptidase 2                                                                                                                                                                                                                                                                                                 | 1.44 | 1.41 |
| Prpf4b                                                                                                                                                                                     | PRP4 pre-mRNA processing factor 4 homolog B (yeast)                                                                                                                                                                                                                                                                               | 1.44 | 1.43 |
| Fam110c                                                                                                                                                                                    | family with sequence similarity 110, member C                                                                                                                                                                                                                                                                                     | 1.43 | 1.49 |
| Exosc8                                                                                                                                                                                     | exosome component 8                                                                                                                                                                                                                                                                                                               | 1.41 | 1.35 |
| Cep192                                                                                                                                                                                     | centrosomal protein 192                                                                                                                                                                                                                                                                                                           | 1.41 | 1.39 |

|               |                                                                                           |       |       |
|---------------|-------------------------------------------------------------------------------------------|-------|-------|
| Ppp3cb        | protein phosphatase 3, catalytic subunit, beta isoform                                    | 1.4   | 1.34  |
| Ywhaq         | tyrosine 3-monooxygenase/tryptophan 5-monooxygenase activation protein, theta polypeptide | 1.39  | 1.33  |
| A830080D01Rik | RIKEN cDNA A830080D01 gene                                                                | 1.38  | 1.34  |
| Tmpo          | thymopoietin                                                                              | 1.34  | 1.32  |
| Nup54         | nucleoporin 54                                                                            | 1.32  | 1.32  |
| Tm2d2         | TM2 domain containing 2                                                                   | -1.32 | -1.38 |
| Drap1         | Dr1 associated protein 1 (negative cofactor 2 alpha)                                      | -1.35 | -1.36 |
| Cbx2          | chromobox homolog 2 (Drosophila Pc class)                                                 | -1.38 | -1.36 |
| Slc17a5       | solute carrier family 17 (anion/sugar transporter), member 5                              | -1.38 | -1.39 |
| Sumf2         | sulfatase modifying factor 2                                                              | -1.38 | -1.38 |
| Rbck1         | RanBP-type and C3HC4-type zinc finger containing 1                                        | -1.39 | -1.4  |
| Krt12         | keratin 12                                                                                | -1.41 | -1.39 |
| Prrc1         | proline-rich coiled-coil 1                                                                | -1.42 | -1.36 |
| Plxna2        | plexin A2                                                                                 | -1.42 | -1.38 |
| Klc3          | kinesin light chain 3                                                                     | -1.44 | -1.32 |
| Mmd           | monocyte to macrophage differentiation-associated                                         | -1.46 | -1.45 |
| Kcnq2         | potassium voltage-gated channel, subfamily Q, member 2                                    | -1.46 | -1.43 |
| Gfod1         | glucose-fructose oxidoreductase domain containing 1                                       | -1.46 | -1.4  |
| Ilkap         | integrin-linked kinase-associated serine/threonine phosphatase 2C                         | -1.47 | -1.42 |
| Plxna1        | plexin A1                                                                                 | -1.48 | -1.44 |
| Pmm1          | phosphomannomutase 1                                                                      | -1.49 | -1.43 |
| 1700094D03Rik | RIKEN cDNA 1700094D03 gene                                                                | -1.49 | -1.43 |
| Bicd2         | bicaudal D homolog 2 (Drosophila)                                                         | -1.5  | -1.49 |
| Lrrc7         | Lrrc7 leucine rich repeat containing 7                                                    | -1.5  | -1.44 |
| Ccdc80        | coiled-coil domain containing 80                                                          | -1.51 | -1.45 |
| Zfp365        | zinc finger protein 365                                                                   | -1.51 | -1.5  |
| 4933433N18Rik | RIKEN cDNA 4933433N18 gene                                                                | -1.52 | -1.47 |
| 6330564D18Rik | RIKEN cDNA 6330564D18 gene                                                                | -1.52 | -1.41 |
| Pde6g         | phosphodiesterase 6G, cGMP-specific, rod, gamma                                           | -1.53 | -1.53 |
| Pla2g4f       | phospholipase A2, group IVF                                                               | -1.53 | -1.44 |
| Vamp2         | vesicle-associated membrane protein 2                                                     | -1.55 | -1.6  |
| Syt11         | synaptotagmin-like 1                                                                      | -1.55 | -1.42 |

|               |                                                                     |       |       |
|---------------|---------------------------------------------------------------------|-------|-------|
| ORF61         | open reading frame 61                                               | -1.57 | -1.45 |
| Ankrd35       | ankyrin repeat domain 35                                            | -1.57 | -1.49 |
| Nodal         | nodal                                                               | -1.58 | -1.49 |
| Frmpd1        | FERM and PDZ domain containing 1                                    | -1.58 | -1.51 |
| Mem1          | maternal embryonic message 1                                        | -1.59 | -1.56 |
| Jarid1c       | jumonji, AT rich interactive domain 1C (Rbp2 like)                  | -1.6  | -1.64 |
| Dnahc2        | dynein, axonemal, heavy chain 2                                     | -1.6  | -1.63 |
| Fam18a        | family with sequence similarity 18, member A                        | -1.61 | -1.55 |
| Armc8         | armadillo repeat containing 8                                       | -1.61 | -1.51 |
| A230106M20Rik | RIKEN cDNA A230106M20 gene                                          | -1.61 | -1.59 |
| Wscd1         | WSC domain containing 1                                             | -1.62 | -1.54 |
| Gas7          | growth arrest specific 7                                            | -1.62 | -1.53 |
| Msx3          | homeobox, msh-like 3                                                | -1.63 | -1.56 |
| Ddx55         | DEAD (Asp-Glu-Ala-Asp) box polypeptide 55, mRNA (cDNA clone MGC)    | -1.63 | -1.52 |
| Oprm1         | opioid receptor, mu 1                                               | -1.64 | -1.62 |
| Zfp703        | zinc finger protein 703                                             | -1.65 | -1.69 |
| Cpt1c         | carnitine palmitoyltransferase 1c                                   | -1.66 | -1.59 |
| Maf           | avian musculoaponeurotic fibrosarcoma (v-maf) AS42 oncogene homolog | -1.66 | -1.47 |
| 2010107G23Rik | RIKEN cDNA 2010107G23 gene                                          | -1.67 | -1.57 |
| Mm.172135.1   |                                                                     | -1.68 | -1.58 |
| Col16a1       | collagen, type XVI, alpha 1                                         | -1.69 | -1.43 |
| Efna3         | ephrin A3                                                           | -1.72 | -1.66 |
| Pou3f1        | POU domain, class 3, transcription factor 1                         | -1.77 | -1.82 |
| Col1a1        | collagen, type I, alpha 1                                           | -1.78 | -1.6  |
| Tia1          | cytotoxic granule-associated RNA binding protein 1                  | -1.78 | -1.75 |
| Dcxr          | dicarbonyl L-xylulose reductase                                     | -1.81 | -1.57 |
| Dcdc2b        | Doublecortin domain-containing protein 2                            | -1.81 | -1.82 |
| 4930555F03Rik | RIKEN cDNA 4930555F03 gene                                          | -1.84 | -1.69 |
| Lbh           | limb-bud and heart                                                  | -1.87 | -1.68 |
| Slc26a2       | solute carrier family 26 (sulfate transporter), member 2            | -1.94 | -1.96 |
| Nlrp6         | NLR family, pyrin domain containing 6                               | -1.94 | -1.65 |
| Vamp3         | Vesicle-associated membrane protein 3 (Vamp3), mRNA                 | -1.96 | -2.06 |
| Per2          | period homolog 2 (Drosophila)                                       | -2.03 | -2.07 |
| Cpt1a         | carnitine palmitoyltransferase 1a, liver                            | -2.06 | -1.74 |
| Adh7          | alcohol dehydrogenase 7 (class IV), mu or sigma polypeptide         | -2.11 | -1.82 |



|               |                                                                                   |       |       |
|---------------|-----------------------------------------------------------------------------------|-------|-------|
| Lce1m         | late cornified envelope 1M                                                        | -2.11 | -2.2  |
| C030009J22Rik | RIKEN cDNA C030009J22 gene                                                        | -2.14 | -1.98 |
| 1700097N02Rik | RIKEN cDNA 1700097N02 gene                                                        | -2.33 | -2.1  |
| Bckdhb        | branched chain ketoacid dehydrogenase E1, beta polypeptide                        | -2.55 | -2.04 |
| Dbp           | D site albumin promoter binding protein                                           | -2.6  | -2.18 |
| Cited4        | Cbp/p300-interacting transactivator, with Glu/Asp-rich carboxy-terminal domain, 4 | -2.62 | -2.03 |
| Clec2g        | C-type lectin domain family 2, member g                                           | -3.45 | -3.07 |
| Erdr1         | Erythroid differentiation regulator 1                                             | -3.87 | -2.88 |
